# Supplementary material
Source: publisher figshare collection journal article supplement (https://sage.figshare.com/ndownloader/files/17682491)
Supplement: Supplementary file 1 [file 17682491]

## SUPPLEMENTARY MATERIAL

### A new sexangularetin derivative from *Camellia hakodae* Ninh.

Nguyen Thanh Tuyen<sup>1</sup>, Tran Van Hieu<sup>1</sup>, Pham Gia Dien<sup>2</sup>, Tran Ninh<sup>3</sup>, Nguyen The Hung<sup>4</sup> and Vu Dinh Hoang<sup>5\*</sup>.

<sup>1</sup> Soc Son Cooperative of Conservation and Development of Medicinal Herbs, Soc Son District, Hanoi, Viet Nam

<sup>2</sup> Institute of Chemistry, Viet Nam Academy of Science and Technology, 18 Hoang Quoc Viet Street, Hanoi, Viet Nam

<sup>3</sup> Hanoi University of Science, 334 Nguyen Trai Street, Hanoi, Viet Nam

<sup>4</sup> Hanoi University of Pharmacy, 15 Le Thanh Tong Street, Hanoi, Viet Nam

<sup>5</sup> School of Chemical Engineering, Hanoi University of Science and Technology, 01 Dai Co Viet Street, Hanoi, Viet Nam

\* Corresponding author: Email: hoang.vudinh@hust.edu.vn

A new flavonoid, sexangularetin 3-*O*-(2''-*O*-(*E*)-*p*-coumaroyl- $\beta$ -D-glucopyranoside) (**1**), together with nine known flavonoid compounds (**2-10**), were isolated from flowers of *Camellia hakodae* Ninh. Their structures were established based on physicochemical and spectroscopic analyses. The new compound displayed moderate to weak cytotoxic activities against HepG2 (IC<sub>50</sub> 192.00  $\mu$ g/mL), Lu (IC<sub>50</sub> 90.18  $\mu$ g/mL), and KB (IC<sub>50</sub> 72.72  $\mu$ g/mL) cell lines, and inactivity against MCF7 (IC<sub>50</sub> 256.00  $\mu$ g/mL).

Keywords: sexangularetin 3-*O*-(2''-*O*-(*E*)-*p*-coumaroyl- $\beta$ -D-glucopyranoside), *Camellia hakodae* Ninh., flavonoid, cytotoxic activity.

## Spectroscopy of the compound **1**

Figure S1. HRESIMS of Compound **1**

Figure S2.  $^1\text{H}$  NMR Spectrum of Compound **1** (500 MHz, MeOD)

Figure S3.  $^{13}\text{C}$  NMR Spectrum of Compound **1** (125 MHz, MeOD)

Figure S4. DEPT Spectra of Compound **1** (125 MHz, MeOD)

Figure S5. COSY Spectrum of Compound **1** (500 MHz, MeOD)

Figure S6. HSQC Spectrum of Compound **1** (500 MHz, MeOD)

Figure S7. HMBC Spectrum of Compound **1** (500 MHz, MeOD)

Figure S8. NOESY Spectrum of Compound **1** (500 MHz, MeOD)

## Biological assay

Table S1. *In vitro* cytotoxic activity of compound **1** against four human cell lines [Lung (Lu), breast (MCF7), epidermoid (KB) and hepatoma (HepG2)].

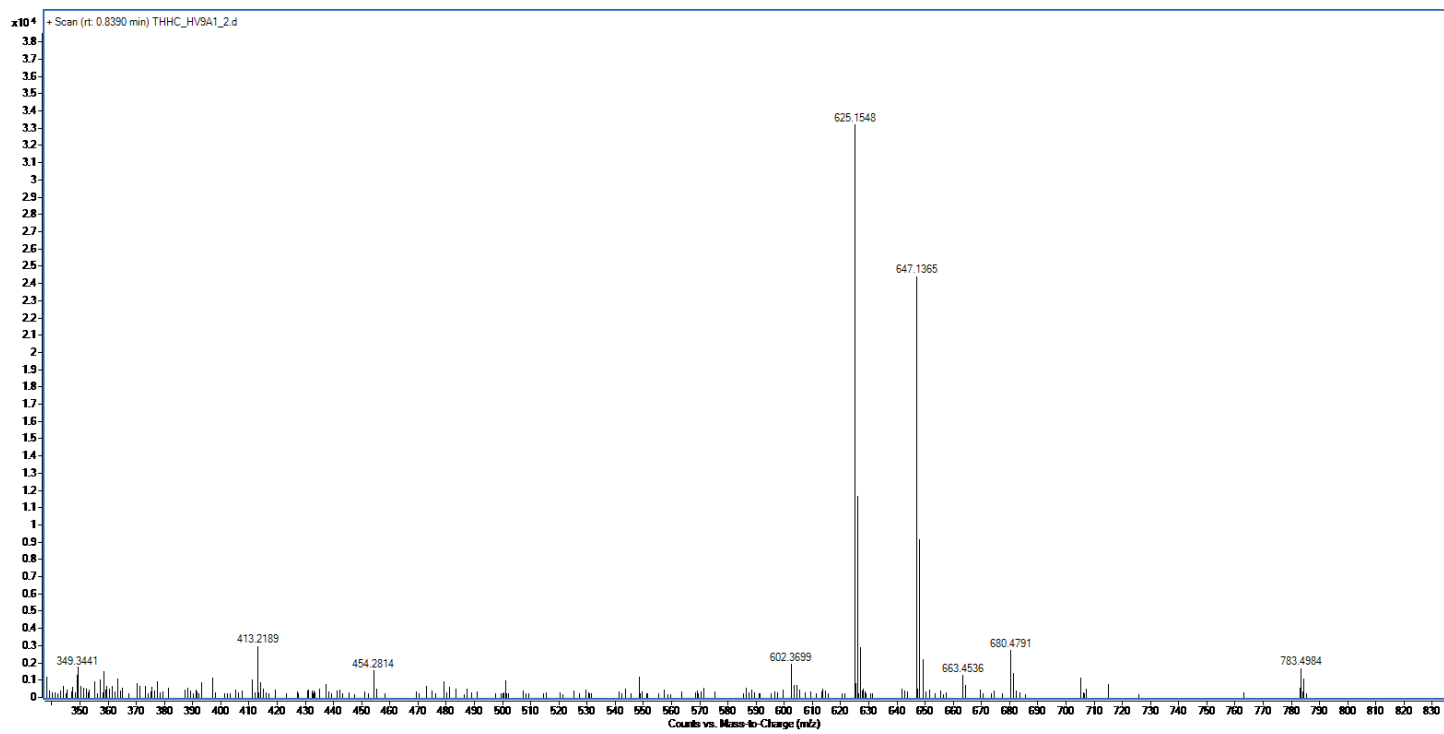

Figure S1. HRESIMS of Compound 1

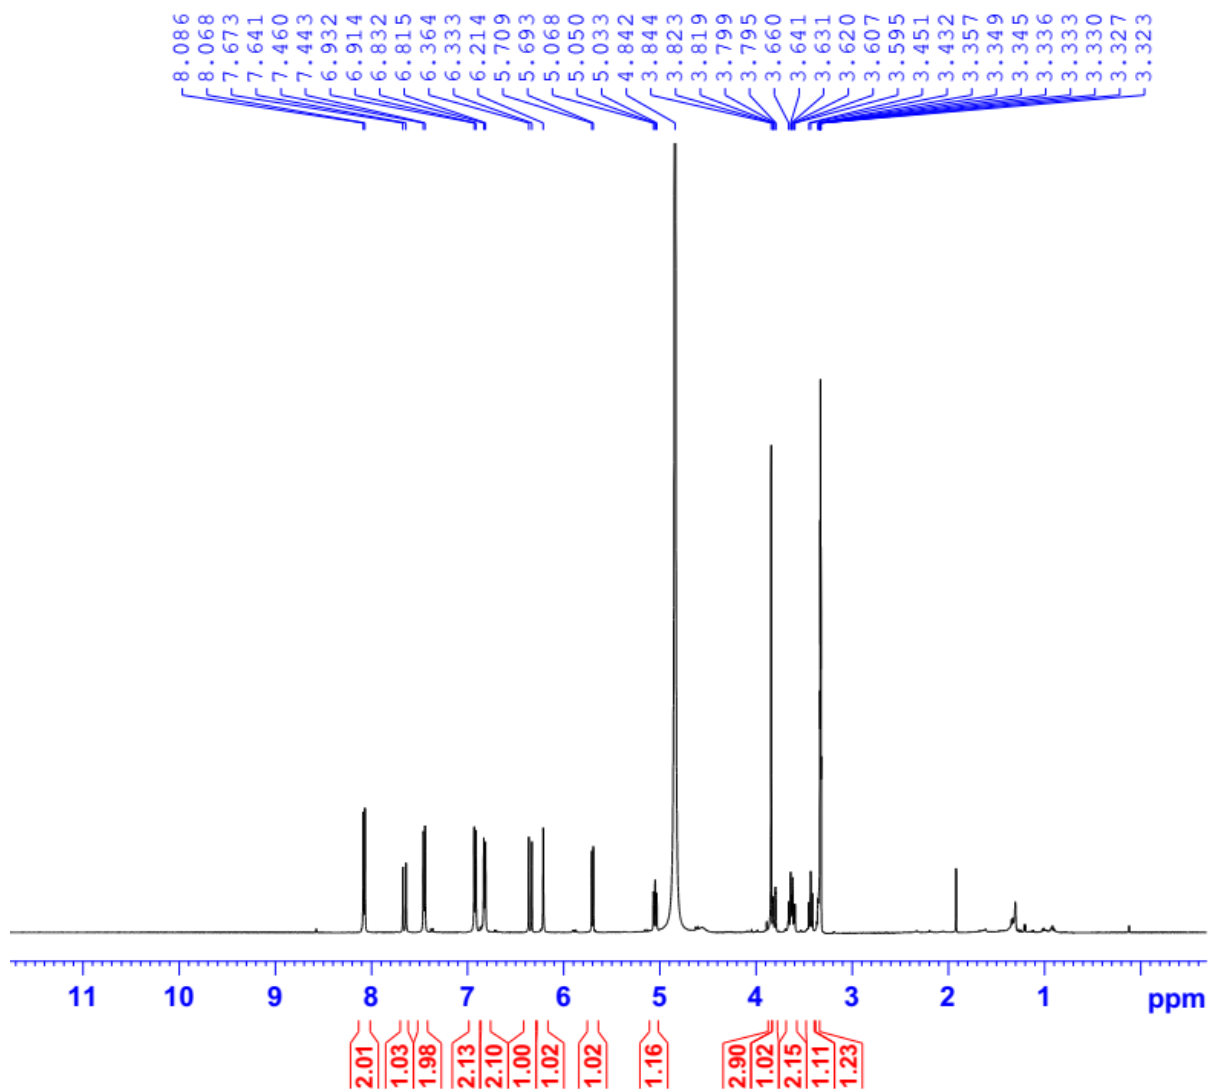

Figure S2. <sup>1</sup>H NMR Spectrum of Compound 1 (500MHz, MeOD)

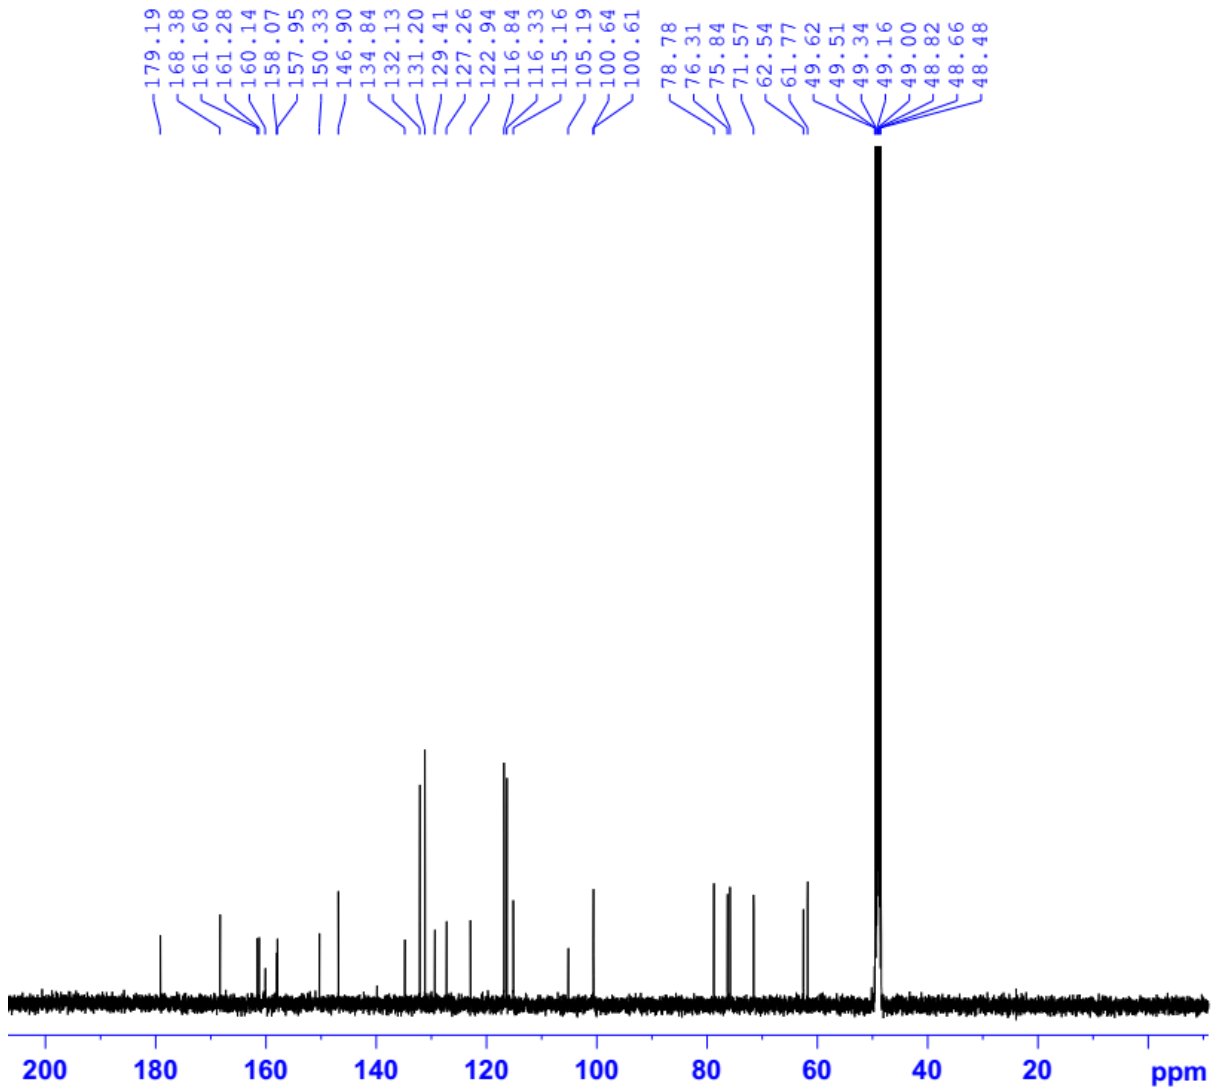

Figure S3.  $^{13}\text{C}$  NMR Spectrum of Compound 1 (125 MHz, MeOD)

DEPT90

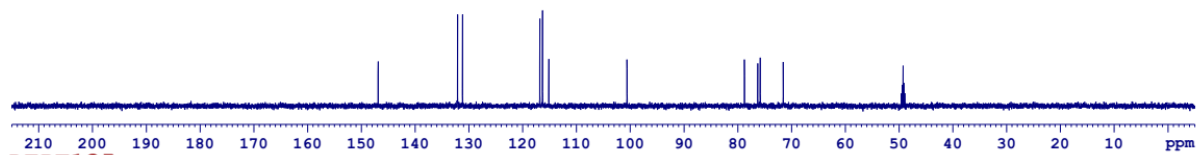

DEPT135

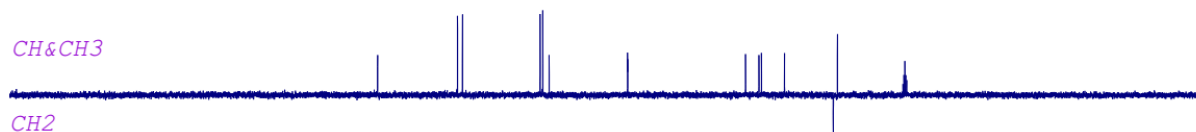

CH&CH3

CH2

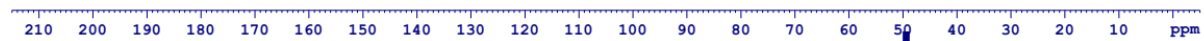

C13CPD

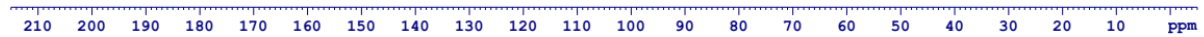

Figure S4. DEPT Spectra of Compound **1** (125 MHz, MeOD)

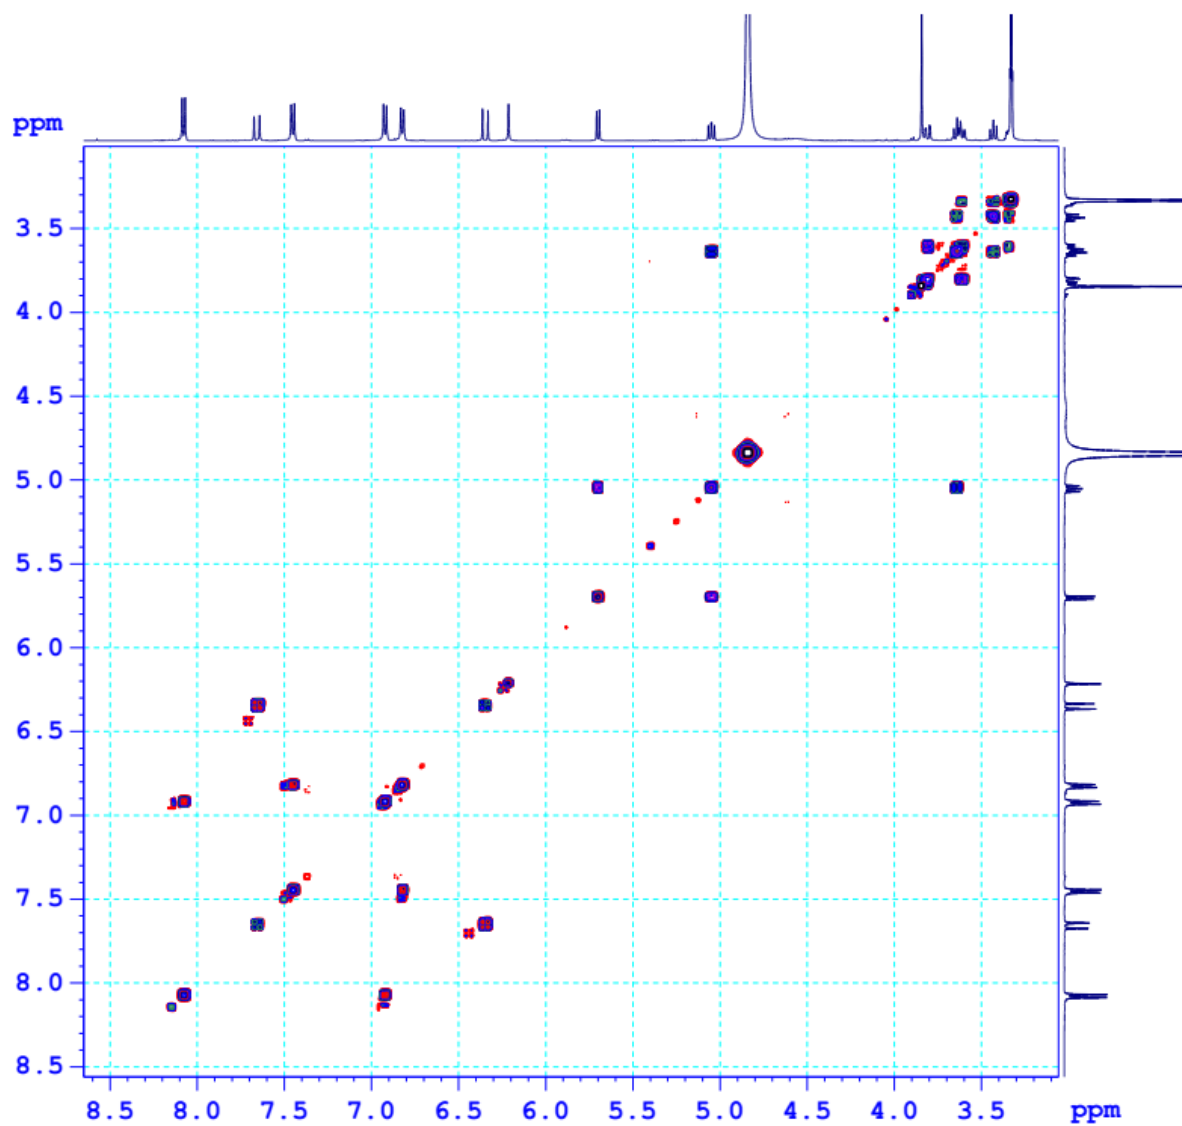

Figure S5. COSY Spectrum of Compound **1** (500MHz, MeOD)

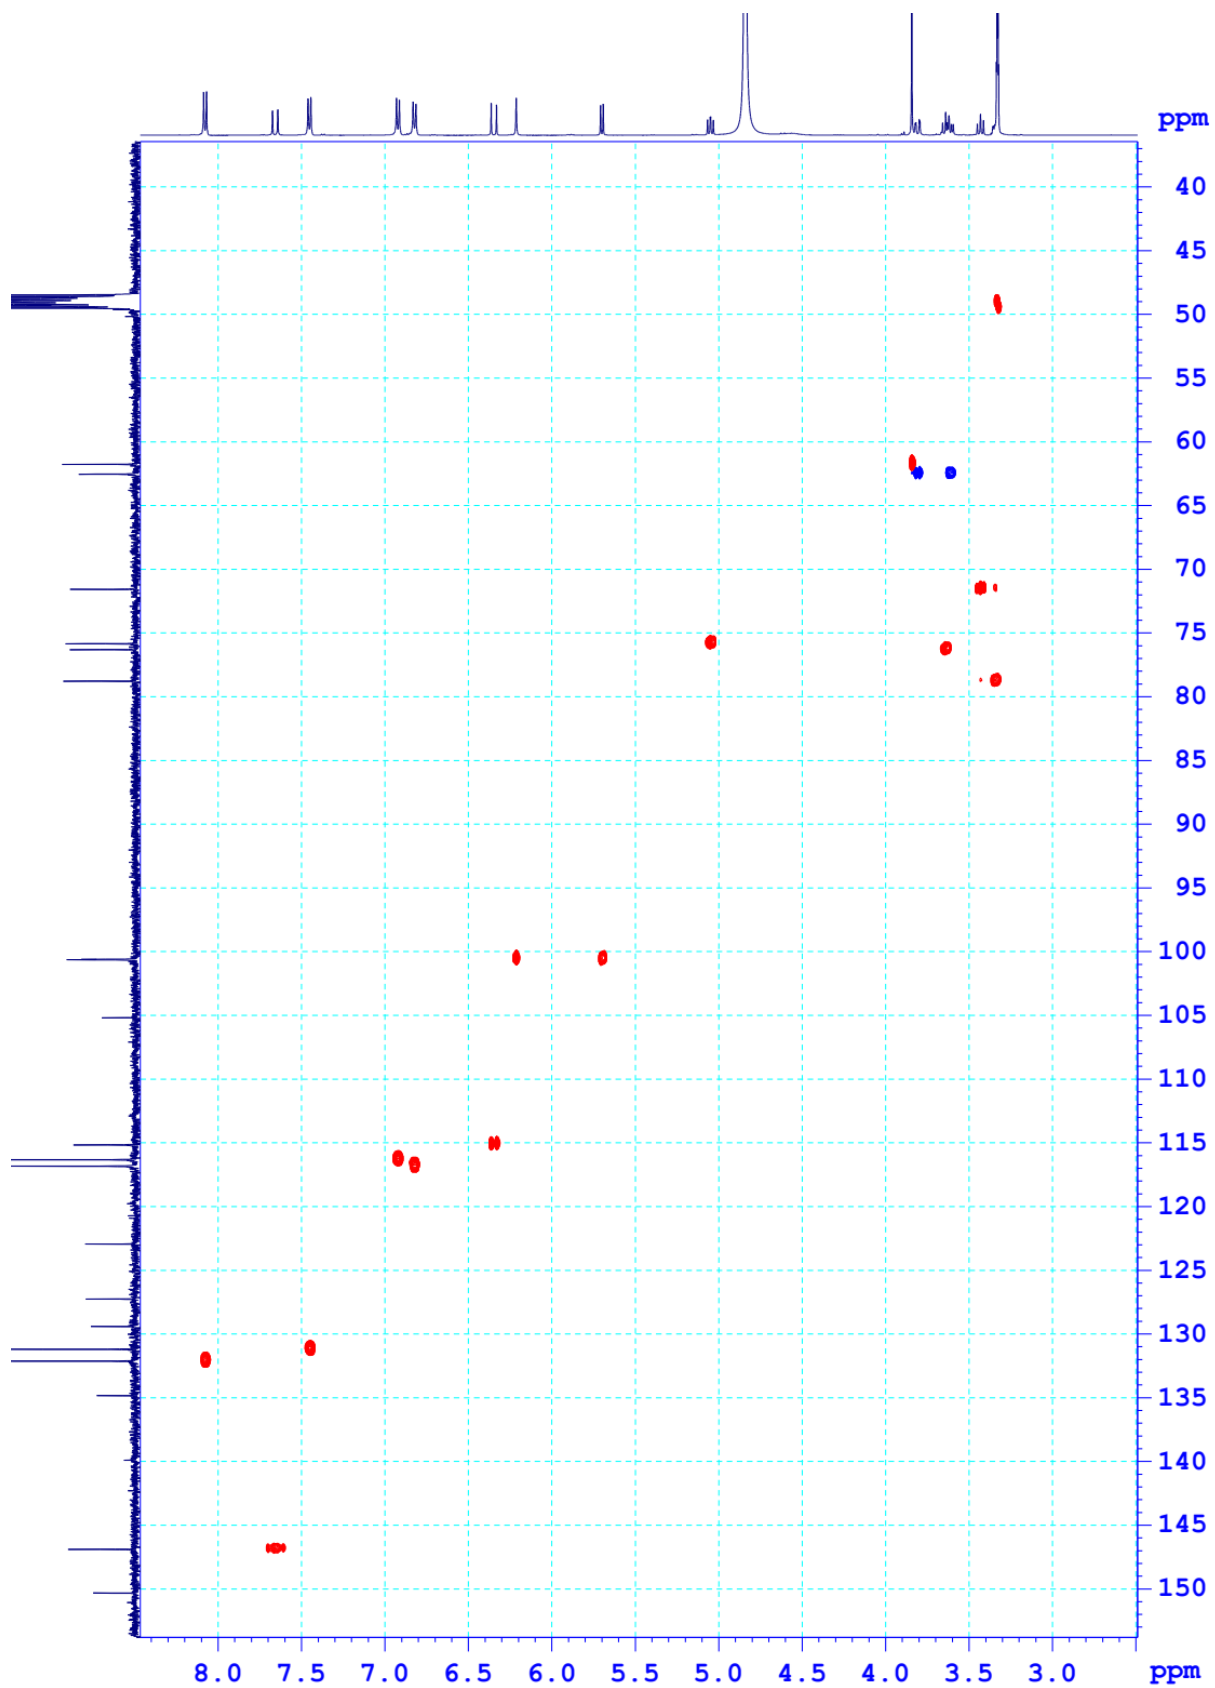

Figure S6. HSQC Spectrum of Compound **1** (500MHz, MeOD)



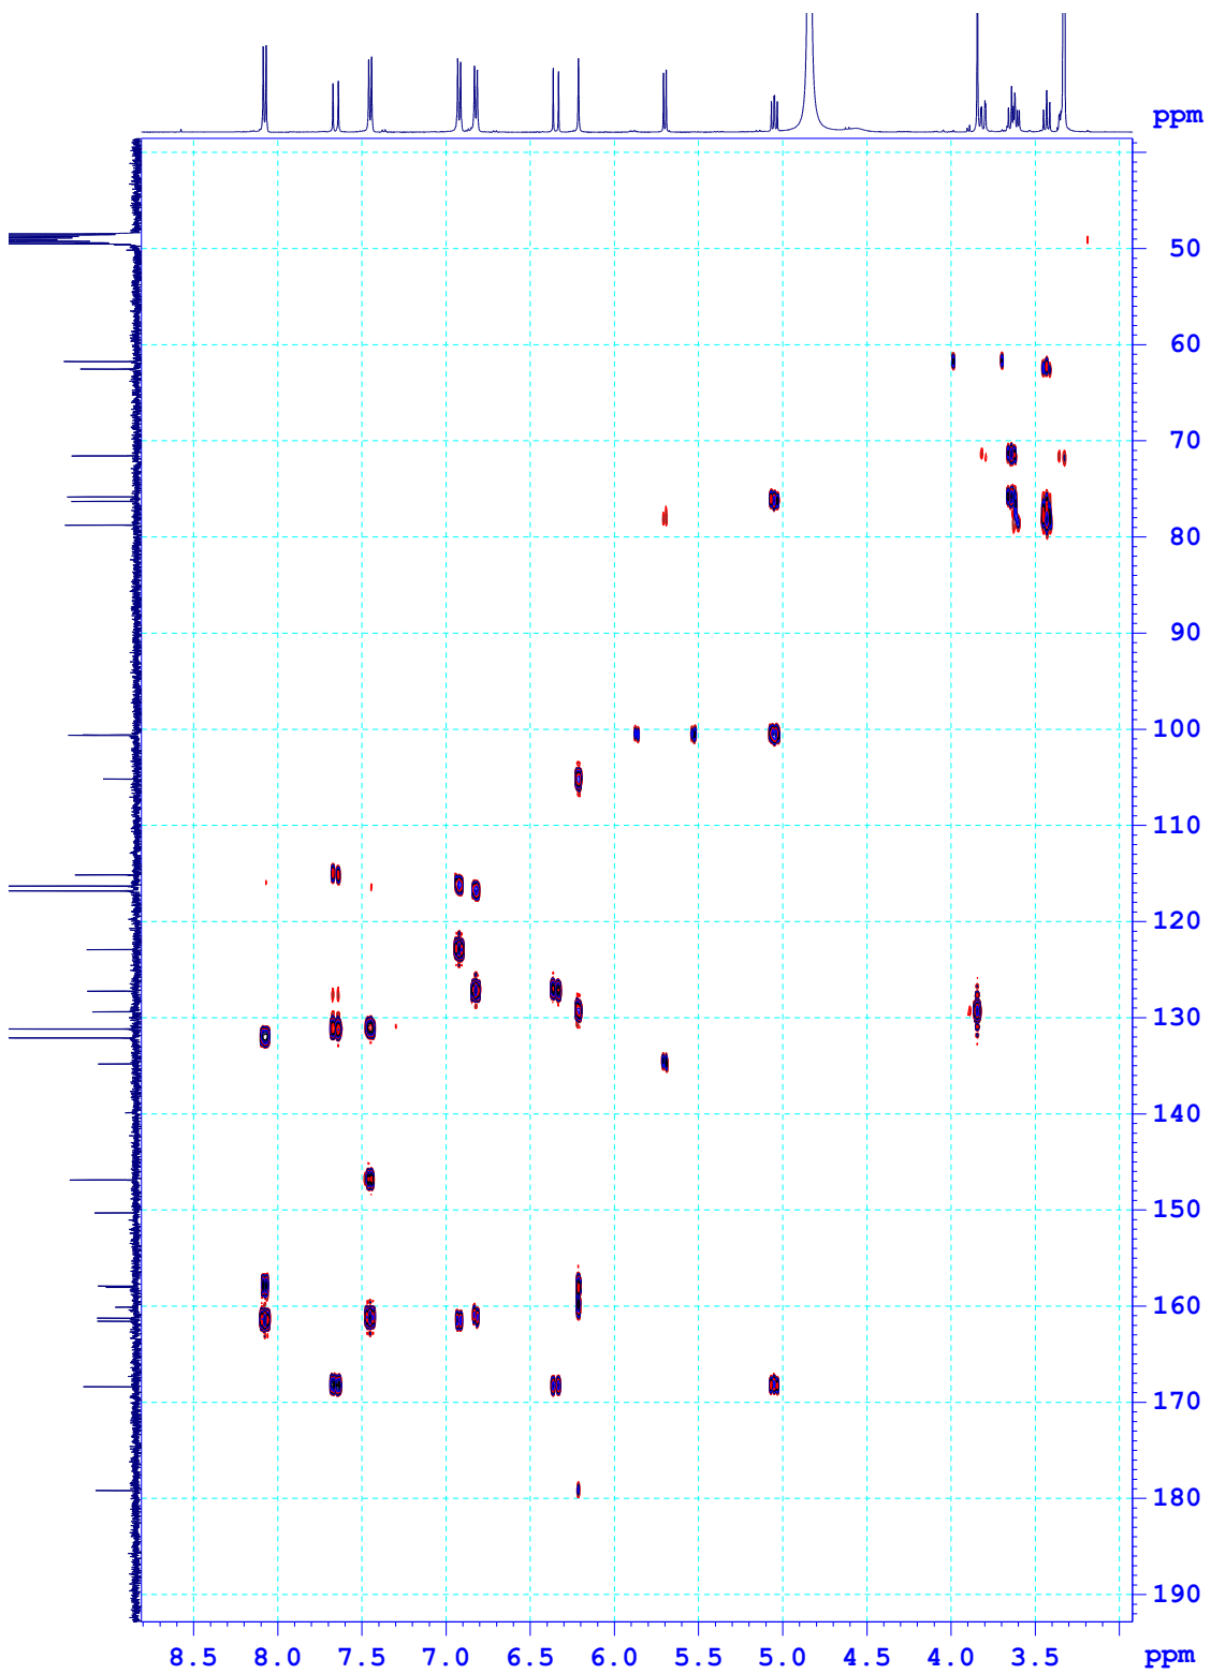

Figure S7. HMBC Spectrum of Compound 1 (500MHz, MeOD)

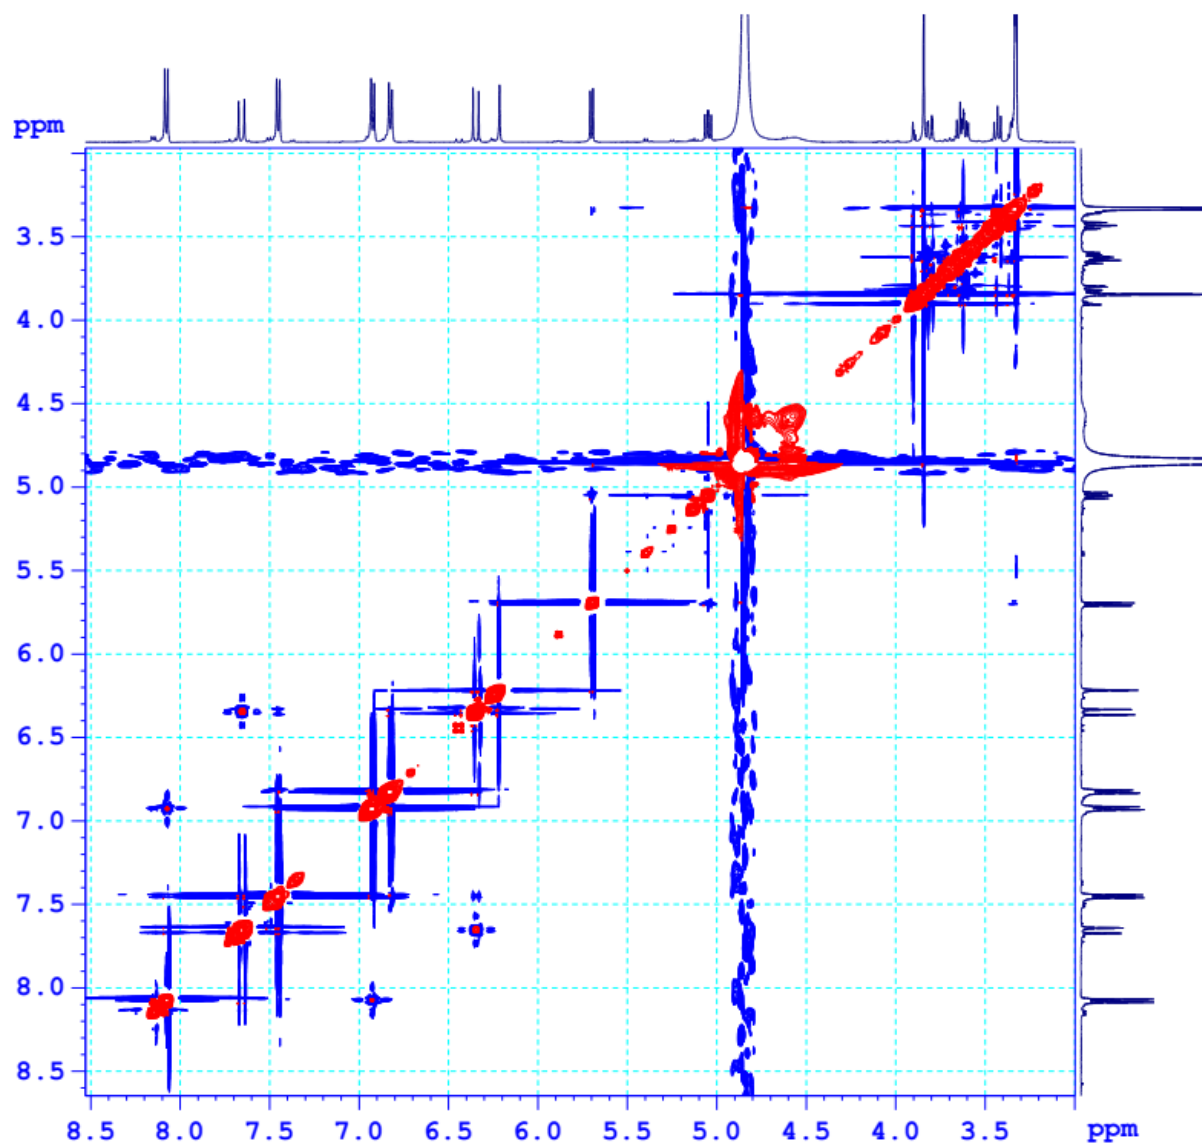

Figure S8. NOESY Spectrum of Compound **1** (500MHz, MeOD)

## ***Biological assay***

### *Cell lines and chemicals*

Human cancer cell lines consisting of lung (Lu), breast (MCF7), epidermoid (KB) and hepatoma (HepG2) were obtained from American Type Culture Collection (ATCC), Manassas, United State of America. 2,2-Diphenyl-1-picryl-hydrazyl (DPPH), Ascorbic acid (AA), Dimethyl sulfoxide (DMSO), 3-(4,5-dimethylthiazol-2-yl)-2,5-diphenyl tetrazolium bromide (MTT salt) and Ellipticine were purchased from Sigma and Fluka, Germany. Other chemicals were of analytical grade.

### *Cytotoxicity assay*

Four human cancer cell lines including MCF7 (breast carcinoma cell line), KB (epidermoid carcinoma cell line), Lu (lung cancer cell line), HepG2 (hepatoma carcinoma cell line) were obtained from the ATCC (Manassas, VA). They were grown in medium RPMI 1640 supplemented with 10% FBS (Fetal bovine serum), 50 IU/ml penicillin and 50 µg/ml streptomycin. All the cell lines were maintained at 37°C in a 5% CO<sub>2</sub> atmosphere with 98% humidity.

The MTT assay is based on the protocol described by Tim Mossmann<sup>1</sup>. The test sample (crude extract and compound), dissolved in DMSO with five concentrations (1.0, 4.0, 16.0, 64.0, and 256.0 µg/mL), were added into the available culture cells and culture plates were incubated for 3 days. After the exposure times, the culture cells were treated with MTT [3-(4,5-dimethylthiazol-2-yl)-2,5-diphenyltetrazolium bromide] while OD was measured at 540 nm absorbance on microplate reader (TECAN GENIOUS). Ellipticine dissolved in DMSO (2 mg/mL), were used as positive control. The inhibitory concentration (IC) values were calculated by formula:

$$IC_{50} = \frac{OD_{control} - OD_{test}}{OD_{control}} \times 100 \quad (1)$$

IC<sub>50</sub> is the concentration in µg/mL required for 50% inhibition of cell growth as compared to that of untreated control.

Table S1. *In vitro* cytotoxic activity of compound **1** against four human cell lines [Lung (Lu), breast (MCF7), epidermoid (KB) and hepatoma (HepG2)].

| Sample      | IC <sub>50</sub> |       |       |      |
|-------------|------------------|-------|-------|------|
|             | KB               | HepG2 | Lu    | MCF7 |
| <b>1</b>    | 72.72            | 192   | 90.18 | 256  |
| Ellipticine | 0.27             | 0.30  | 0.35  | 0.48 |

## References

- [1] Mosmann T. Rapid colorimetric assay for cellular growth and survival: Application to proliferation and cytotoxicity assays. *J Immunol Methods*. 1983;65(1-2):55-63.
